# Supplementary material for: Putative source and niche shift pattern of a new alien ant species (Odontomachus troglodytes) in Taiwan
Source: PeerJ journal article supplement (doi:10.7717/peerj.14718), 2023-02-06

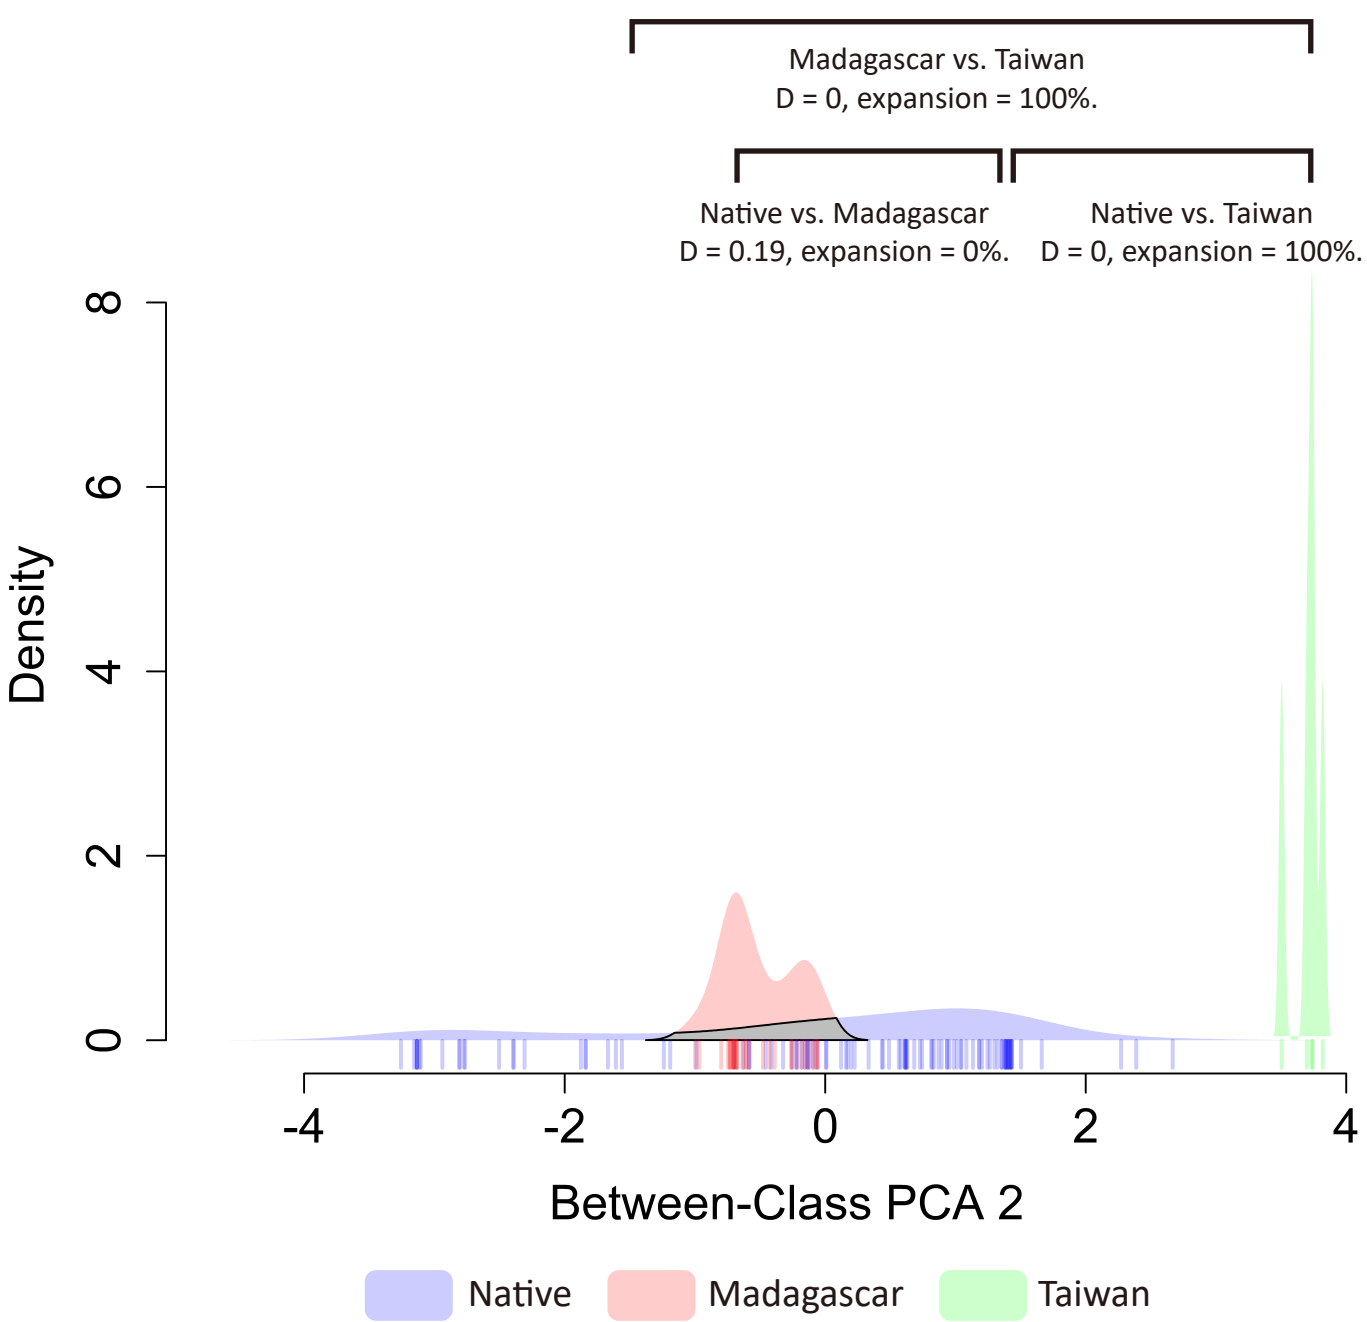

Supplement: Supplemental_Fig_S6_20221214.pdf [file Supplemental_Fig_S6_20221214.pdf]
